# Supplementary material for: Gallic Acid Based Black Tea Extract as a Stabilizing Agent in ZnO Particles Green Synthesis
Source: MDPI journal article supplement (doi:10.3390/nano11071816), 2021-07-13
Supplement: s1 [file s1]

Supporting Information for

# Gallic Acid Based Black Tea Extract as A Stabilizing Agent in ZnO Particles Green Synthesis

**Marta Fiedot-Toboła<sup>1,\*</sup>, Anna Dmochowska<sup>1</sup>, Bartłomiej Potaniec<sup>1</sup>, Joanna Czajkowska<sup>1</sup>, Roman Jędrzejewski<sup>1</sup>, Magdalena Wilk-Kozubek<sup>1</sup>, Ewa Carolak<sup>1</sup> and Joanna Cybińska<sup>1,2</sup>**

<sup>1</sup> Łukasiewicz Research Network–PORT Polish Center for Technology Development, Stabłowicka 147, 54-066 Wrocław, Poland; anna.dmochowska@ensam.eu (A.D.); bartlomiej.potaniec@port.lukasiewicz.gov.pl (B.P.); joanna.czajkowska@port.lukasiewicz.gov.pl (J.C.); roman.jedrzejewski@port.lukasiewicz.gov.pl (R.J.); magdalena.wilk-kozubek@port.lukasiewicz.gov.pl (M.W-K.); ewa.carolak@port.lukasiewicz.gov.pl (E.C.); joanna.cybinska@port.lukasiewicz.gov.pl (J.C.)

<sup>2</sup> Faculty of Chemistry, University of Wrocław, 14 F. Joliot-Curie Str. 50-383 Wrocław, Poland

\* Correspondence: marta.fiedot-tobola@port.lukasiewicz.gov.pl; Tel.: +48-71-734-7154

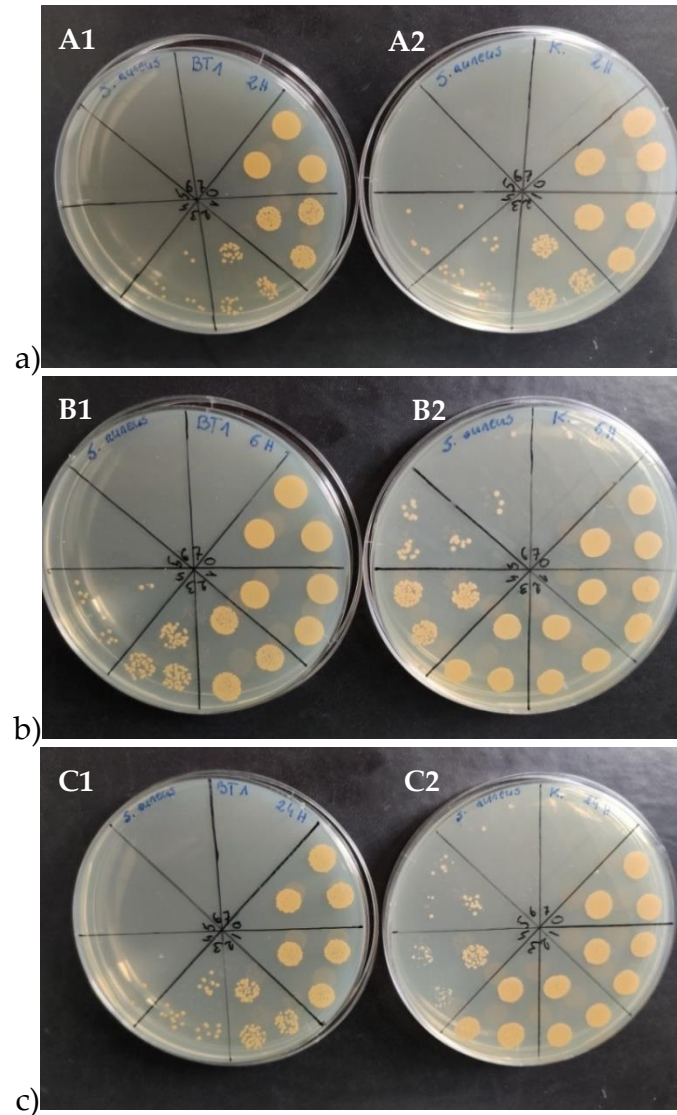

**Figure S1.** Images of TSA plates after culturing and incubation with *S. aureus* ATCC 6538 at 37°C for 24 hours: a) A1: plate after 2h of treatment BT1, A2: control plate, b) B1: plate after 6h of treatment BT1, B2: control plate, c) C1: plate after 24h of treatment BT1, C2: control plate.

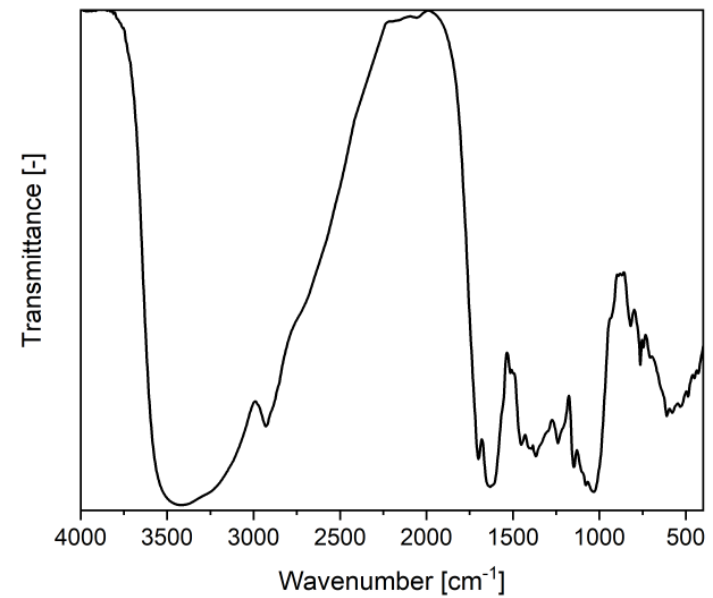

**Figure S2.** FTIR spectrum of black tea extract.

**Table S1.** Data obtained from LC-MS experiments.

| Negative ion mode |                |                                                                                                      |                                                 |                   |             |                    |          |                                                 |
|-------------------|----------------|------------------------------------------------------------------------------------------------------|-------------------------------------------------|-------------------|-------------|--------------------|----------|-------------------------------------------------|
| No .              | m/z [measured] | Identification                                                                                       | Molecular formula of ion                        | m/z [theoretical] | Error [ppm] | Adduct (ion)       | RT [min] | Molecular formula                               |
| 1                 | 191.0576       | Quinic acid                                                                                          | C <sub>7</sub> H <sub>11</sub> O <sub>6</sub>   | 191.0561          | 8.0         | [M-H] <sup>-</sup> | 1.0      | C <sub>7</sub> H <sub>12</sub> O <sub>6</sub>   |
| 2                 | 169.0146       | Gallic acid                                                                                          | C <sub>7</sub> H <sub>5</sub> O <sub>5</sub>    | 169.0142          | -2.2        | [M-H] <sup>-</sup> | 1.4      | C <sub>7</sub> H <sub>6</sub> O <sub>5</sub>    |
| 3                 | 353.0875       | Chlorogenic / Neochlorogenic acid                                                                    | C <sub>16</sub> H <sub>17</sub> O <sub>9</sub>  | 353.0878          | -0.9        | [M-H] <sup>-</sup> | 7.0      | C <sub>16</sub> H <sub>18</sub> O <sub>9</sub>  |
| 4                 | 761.1361       | Theasinesin B / Prodelphinidin- <i>O</i> -gallate                                                    | C <sub>37</sub> H <sub>29</sub> O <sub>18</sub> | 761.1359          | -0.2        | [M-H] <sup>-</sup> | 7.2      | C <sub>37</sub> H <sub>30</sub> O <sub>18</sub> |
| 5                 | 305.0668       | Gallocatechin / Epigallocatechin                                                                     | C <sub>15</sub> H <sub>13</sub> O <sub>7</sub>  | 305.0667          | 0.4         | [M-H] <sup>-</sup> | 7.4      | C <sub>15</sub> H <sub>14</sub> O <sub>7</sub>  |
| 6                 | 337.0928       | <i>p</i> -Coumaroylquinic acid (isomer I)                                                            | C <sub>16</sub> H <sub>17</sub> O <sub>8</sub>  | 337.0929          | -0.3        | [M-H] <sup>-</sup> | 7.6      | C <sub>16</sub> H <sub>18</sub> O <sub>8</sub>  |
| 7                 | 337.0926       | <i>p</i> -Coumaroylquinic acid (isomer II)                                                           | C <sub>16</sub> H <sub>17</sub> O <sub>8</sub>  | 337.0929          | 0.9         | [M-H] <sup>-</sup> | 8.2      | C <sub>16</sub> H <sub>18</sub> O <sub>8</sub>  |
| 8                 | 337.0928       | <i>p</i> -Coumaroylquinic acid (isomer III)                                                          | C <sub>16</sub> H <sub>17</sub> O <sub>8</sub>  | 337.0929          | -0.3        | [M-H] <sup>-</sup> | 8.6      | C <sub>16</sub> H <sub>18</sub> O <sub>8</sub>  |
| 9                 | 289.0719       | Catechin                                                                                             | C <sub>15</sub> H <sub>13</sub> O <sub>6</sub>  | 289.0718          | 0.3         | [M-H] <sup>-</sup> | 7.7      | C <sub>15</sub> H <sub>14</sub> O <sub>6</sub>  |
| 10                | 289.0717       | Epicatechin                                                                                          | C <sub>15</sub> H <sub>13</sub> O <sub>6</sub>  | 289.0718          | -0.3        | [M-H] <sup>-</sup> | 8.2      | C <sub>15</sub> H <sub>14</sub> O <sub>6</sub>  |
| 11                | 595.1665       | Eriocitrin                                                                                           | C <sub>27</sub> H <sub>31</sub> O <sub>15</sub> | 595.1668          | -0.5        | [M-H] <sup>-</sup> | 7.7      | C <sub>27</sub> H <sub>32</sub> O <sub>15</sub> |
| 12                | 353.0878       | Chlorogenic / Neochlorogenic acid                                                                    | C <sub>16</sub> H <sub>17</sub> O <sub>9</sub>  | 353.0878          | -0.1        | [M-H] <sup>-</sup> | 7.8      | C <sub>16</sub> H <sub>18</sub> O <sub>9</sub>  |
| 13                | 593.1515       | Epicatechin digallate / Kaempferol rutinoside / Kaempferol galactosyl rhamnoside / unknown conjugate | C <sub>27</sub> H <sub>29</sub> O <sub>15</sub> | 593.1512          | -0.4        | [M-H] <sup>-</sup> | 8.0      | C <sub>27</sub> H <sub>30</sub> O <sub>15</sub> |
| 14                | 593.1512       | Epicatechin digallate / Kaempferol rutinoside / Kaempferol galactosyl rhamnoside / unknown conjugate | C <sub>27</sub> H <sub>29</sub> O <sub>15</sub> | 593.1512          | 0           | [M-H] <sup>-</sup> | 8.6      | C <sub>27</sub> H <sub>30</sub> O <sub>15</sub> |
| 15                | 593.1514       | Epicatechin digallate / Kaempferol rutinoside / Kaempferol galactosyl rhamnoside / unknown conjugate | C <sub>27</sub> H <sub>29</sub> O <sub>15</sub> | 593.1512          | 0.3         | [M-H] <sup>-</sup> | 9.2      | C <sub>27</sub> H <sub>30</sub> O <sub>15</sub> |
| 16                | 593.1511       | Epicatechin digallate / Kaempferol rutinoside / Kaempferol galactosyl rhamnoside / unknown conjugate | C <sub>27</sub> H <sub>29</sub> O <sub>15</sub> | 593.1512          | -0.2        | [M-H] <sup>-</sup> | 9.4      | C <sub>27</sub> H <sub>30</sub> O <sub>15</sub> |
| 17                | 563.1405       | Catechin/Epicatechin glycoconjugate                                                                  | C <sub>26</sub> H <sub>27</sub> O <sub>14</sub> | 563.1406          | -0.2        | [M-H] <sup>-</sup> | 8.4      | C <sub>26</sub> H <sub>28</sub> O <sub>14</sub> |
| 18                | 479.0832       | Myricetin-3- <i>O</i> -galactoside/glucoside                                                         | C <sub>21</sub> H <sub>19</sub> O <sub>13</sub> | 479.0831          | 0.3         | [M-H] <sup>-</sup> | 8.6      | C <sub>21</sub> H <sub>20</sub> O <sub>13</sub> |
| 19                | 771.1991       | Quercetin based triglycoside                                                                         | C <sub>33</sub> H <sub>39</sub> O <sub>21</sub> | 771.1989          | -0.3        | [M-H] <sup>-</sup> | 8.6      | C <sub>33</sub> H <sub>40</sub> O <sub>21</sub> |
| 20                | 755.2040       | Quercetin based triglycoside (deoxyhexose-hexose-deoxyhexose)                                        | C <sub>33</sub> H <sub>39</sub> O <sub>20</sub> | 755.2040          | 0           | [M-H] <sup>-</sup> | 8.8      | C <sub>33</sub> H <sub>40</sub> O <sub>20</sub> |
| 21                | 755.2046       | Kaempferol based triglycoside                                                                        | C <sub>33</sub> H <sub>39</sub> O <sub>20</sub> | 755.2040          | 0.8         | [M-H] <sup>-</sup> | 9.0      | C <sub>33</sub> H <sub>40</sub> O <sub>20</sub> |
| 22                | 273.0767       | Afzelechin / Epiafzelechin                                                                           | C <sub>15</sub> H <sub>13</sub> O <sub>5</sub>  | 273.0768          | -0.4        | [M-H] <sup>-</sup> | 8.8      | C <sub>15</sub> H <sub>14</sub> O <sub>5</sub>  |
| 23                | 609.1459       | Quercetin diglycoside (hexose-deoxyhexose)                                                           | C <sub>27</sub> H <sub>29</sub> O <sub>16</sub> | 609.1461          | -0.3        | [M-H] <sup>-</sup> | 8.9      | C <sub>27</sub> H <sub>30</sub> O <sub>16</sub> |
| 24                | 739.2090       | Kaempferol triglycoside (deoxyhexose-hexose-deoxyhexose)                                             | C <sub>33</sub> H <sub>39</sub> O <sub>19</sub> | 739.2091          | 0.1         | [M-H] <sup>-</sup> | 9.0      | C <sub>33</sub> H <sub>40</sub> O <sub>19</sub> |
| 25                | 431.0981       | Vitexin / Isovitexin                                                                                 | C <sub>21</sub> H <sub>19</sub> O <sub>10</sub> | 431.0984          | -0.6        | [M-H] <sup>-</sup> | 9.0      | C <sub>21</sub> H <sub>20</sub> O <sub>10</sub> |

| 26                | 441.0827       | Epicatechin/Catechin gallate                      | C <sub>22</sub> H <sub>17</sub> O <sub>10</sub>              | 441.0827          | 0.1         | [M-H] <sup>-</sup>   | 9.2      | C <sub>22</sub> H <sub>18</sub> O <sub>10</sub>              |
|-------------------|----------------|---------------------------------------------------|--------------------------------------------------------------|-------------------|-------------|----------------------|----------|--------------------------------------------------------------|
| 27                | 463.0878       | Quercetin hexoside                                | C <sub>21</sub> H <sub>19</sub> O <sub>12</sub>              | 463.0882          | 0.8         | [M-H] <sup>-</sup>   | 9.2      | C <sub>21</sub> H <sub>20</sub> O <sub>12</sub>              |
| 28                | 447.0931       | Kaempferol hexoside                               | C <sub>21</sub> H <sub>19</sub> O <sub>11</sub>              | 447.0933          | 0.3         | [M-H] <sup>-</sup>   | 9.5      | C <sub>21</sub> H <sub>20</sub> O <sub>11</sub>              |
| 29                | 447.0928       | Kaempferol hexoside                               | C <sub>21</sub> H <sub>19</sub> O <sub>11</sub>              | 447.0933          | -1.1        | [M-H] <sup>-</sup>   | 9.7      | C <sub>21</sub> H <sub>20</sub> O <sub>11</sub>              |
| 30                | 516.1371       | Quercetin based glycoconjugate                    | C <sub>47</sub> H <sub>52</sub> O <sub>26</sub>              | 516.1379          | -1.6        | [M-2H] <sup>2-</sup> | 10.5     | C <sub>47</sub> H <sub>54</sub> O <sub>26</sub>              |
| 31                | 1033.2831      | Quercetin based glycoconjugate                    | C <sub>47</sub> H <sub>53</sub> O <sub>26</sub>              | 1033.2831         | -0.1        | [M-H] <sup>-</sup>   | 10.5     | C <sub>47</sub> H <sub>54</sub> O <sub>26</sub>              |
| 32                | 450.1161       | Quercetin based acylated triglycosiede            | C <sub>42</sub> H <sub>44</sub> O <sub>22</sub>              | 450.1168          | 1.6         | [M-2H] <sup>2-</sup> | 10.7     | C <sub>42</sub> H <sub>46</sub> O <sub>22</sub>              |
| 33                | 901.2405       | Quercetin based acylated triglycosiede            | C <sub>42</sub> H <sub>45</sub> O <sub>22</sub>              | 901.2408          | 0.4         | [M-H] <sup>-</sup>   | 10.7     | C <sub>42</sub> H <sub>46</sub> O <sub>22</sub>              |
| 34                | 442.1184       | Catechin/Epicatechin based glycoconjugate         | C <sub>42</sub> H <sub>44</sub> O <sub>21</sub>              | 442.1193          | -2.1        | [M-2H] <sup>2-</sup> | 11.0     | C <sub>42</sub> H <sub>46</sub> O <sub>21</sub>              |
| 35                | 885.2453       | Catechin/Epicatechin based glycoconjugate         | C <sub>42</sub> H <sub>45</sub> O <sub>21</sub>              | 885.2459          | -0.7        | [M-H] <sup>-</sup>   | 11.0     | C <sub>42</sub> H <sub>46</sub> O <sub>21</sub>              |
| 36                | 715.1301       | Theaflavin gallate                                | C <sub>36</sub> H <sub>27</sub> O <sub>16</sub>              | 715.1305          | 0.5         | [M-H] <sup>-</sup>   | 11.5     | C <sub>36</sub> H <sub>28</sub> O <sub>16</sub>              |
| 37                | 715.1304       | Theaflavin gallate                                | C <sub>36</sub> H <sub>27</sub> O <sub>16</sub>              | 715.1305          | -0.1        | [M-H] <sup>-</sup>   | 11.7     | C <sub>36</sub> H <sub>28</sub> O <sub>16</sub>              |
| 38                | 301.0351       | Quercetin                                         | C <sub>15</sub> H <sub>9</sub> O <sub>7</sub>                | 301.0354          | 1.0         | [M-H] <sup>-</sup>   | 11.9     | C <sub>15</sub> H <sub>10</sub> O <sub>7</sub>               |
| 39                | 867.1432       | Theaflavin digallate                              | C <sub>43</sub> H <sub>31</sub> O <sub>20</sub>              | 867.1414          | -2.1        | [M-H] <sup>-</sup>   | 12.1     | C <sub>43</sub> H <sub>32</sub> O <sub>20</sub>              |
| 40                | 285.0404       | Kaempferol                                        | C <sub>15</sub> H <sub>9</sub> O <sub>6</sub>                | 285.0405          | 0.3         | [M-H] <sup>-</sup>   | 13.4     | C <sub>15</sub> H <sub>10</sub> O <sub>6</sub>               |
| 41                | 227.1286       | dihydroxycarboxylic / dicarboxylic acid or esther | C <sub>12</sub> H <sub>19</sub> O <sub>4</sub>               | 227.1289          | 1.2         | [M-H] <sup>-</sup>   | 15.7     | C <sub>12</sub> H <sub>20</sub> O <sub>4</sub>               |
| 42                | 227.1288       | Acetylated hydroxycarboxylic acid                 | C <sub>12</sub> H <sub>19</sub> O <sub>4</sub>               | 227.1289          | -0.2        | [M-H] <sup>-</sup>   | 16.0     | C <sub>12</sub> H <sub>20</sub> O <sub>4</sub>               |
| 43                | 293.1759       | Unknown carboxylic acid or esther                 | C <sub>17</sub> H <sub>25</sub> O <sub>4</sub>               | 293.1758          | -0.4        | [M-H] <sup>-</sup>   | 16.4     | C <sub>17</sub> H <sub>26</sub> O <sub>4</sub>               |
| 44                | 563.1192       | Theaflavin                                        | C <sub>29</sub> H <sub>23</sub> O <sub>12</sub>              | 563.1195          | 0.6         | [M-H] <sup>-</sup>   | 11.2     | C <sub>29</sub> H <sub>24</sub> O <sub>12</sub>              |
| Positive ion mode |                |                                                   |                                                              |                   |             |                      |          |                                                              |
| No                | m/z [measured] | Identification                                    | Molecular formula of ion                                     | m/z [theoretical] | Error [ppm] | Adduct (ion)         | RT [min] | Molecular formula                                            |
| 1                 | 175.1083       | Theanine                                          | C <sub>7</sub> H <sub>15</sub> N <sub>2</sub> O <sub>3</sub> | 175.1077          | 3.4         | [M+H] <sup>+</sup>   | 1.0      | C <sub>7</sub> H <sub>14</sub> N <sub>2</sub> O <sub>3</sub> |
| 2                 | 195.0886       | Caffeine                                          | C <sub>8</sub> H <sub>11</sub> N <sub>4</sub> O <sub>2</sub> | 195.0877          | 4.8         | [M+H] <sup>+</sup>   | 7.7      | C <sub>8</sub> H <sub>10</sub> N <sub>4</sub> O <sub>2</sub> |
| 3                 | 130.0864       | Cycloleucine                                      | C <sub>6</sub> H <sub>12</sub> NO <sub>2</sub>               | 130.0863          | 1.0         | [M+H] <sup>+</sup>   | 1.3      | C <sub>6</sub> H <sub>11</sub> NO <sub>2</sub>               |
| 4                 | 166.0865       | Phenylalanine                                     | C <sub>9</sub> H <sub>12</sub> NO <sub>2</sub>               | 166.0863          | -1.5        | [M+H] <sup>+</sup>   | 1.3      | C <sub>9</sub> H <sub>11</sub> NO <sub>2</sub>               |
